# Supplementary material for: Understanding West Nile virus transmission: Mathematical modelling to quantify the most critical parameters to predict infection dynamics
Source: PubMed Central journal article supplement (PMC10174579; doi:10.1371/journal.pntd.0010252), 2023-05-01
Supplement: pntd.0010252.s001.pdf [file pntd.0010252.s001.pdf]

1 **Understanding West Nile virus transmission: mathematical**  
2 **modelling to quantify the most critical parameters to predict**  
3 **infection dynamics**

4 Elisa Fesce<sup>1\*</sup>, Giovanni Marini<sup>2</sup>, Roberto Rosà<sup>2,3</sup>, Davide Lelli<sup>4</sup>, Monica Pierangela Cerioli<sup>4</sup>, Mario Chiari<sup>5</sup>, Marco  
5 Farioli<sup>5</sup>, Nicola Ferrari<sup>1,6</sup>

6

7 <sup>1</sup>Department of Veterinary Medicine and Animal Science (DiVAS), Wildlife Health management & One Health Lab, Università degli Studi  
8 di Milano, Lodi (LO), Italy

9 <sup>2</sup>Research and Innovation Centre, Fondazione Edmund Mach, San Michele all'Adige, Trento (TN), Italy

10 <sup>3</sup>Center Agriculture Food Environment, University of Trento, San Michele all'Adige, Trento (TN), Italy

11 <sup>4</sup>Istituto Zooprofilattico Sperimentale della Lombardia e dell'Emilia Romagna "Bruno Ubertini" (IZSLER), Brescia (BS), Italy

12 <sup>5</sup>Regional Veterinary Authority of Lombardy, Direzione Generale Welfare, Milano (MI), Italy

13 <sup>6</sup>Centro di Ricerca Coordinata Epidemiologia e Sorveglianza Molecolare delle Infezioni, Università degli Studi di Milano, Milano (MI),  
14 Italy

15

16 \* elisa.fesce@unimi.it (EF)

17 **Epidemiological model structure**

18 According with the scheme reported in Fig A we simulated WNV spread into the Lombardy region through  
19 the following system of differential equations:

20

21

$$\left\{ \begin{array}{l}
M'_S(t) = \omega(t) - \left( b \cdot p \cdot p_{BM} \cdot \frac{B_{Ia}(t) + B_{Ij}(t)}{B_T(t)} + \mu_M \right) \cdot M_S(t) \\
M'_E(t) = b \cdot p \cdot p_{BM} \cdot \frac{B_{Ia}(t) + B_{Ij}(t)}{B_T(t)} \cdot M_S(t) - (\theta_M + \mu_M) \cdot M_E(t) \\
M'_I(t) = \theta_M \cdot M_E(t) - \mu_M \cdot M_I(t) \\
B'_{Sa}(t) = - \left( b \cdot p_{MB} \cdot \frac{M_I(t)}{B_T(t)} + \mu_B \right) \cdot B_{Sa}(t) \\
B'_{Ea}(t) = b \cdot p_{MB} \cdot \frac{M_I(t)}{B_T(t)} \cdot B_{Sa}(t) - (\mu_B + \theta_B) \cdot B_{Ea} \\
B'_{Ia}(t) = \theta_B \cdot B_{Ea} - (\mu_B + \nu_B) \cdot B_{Ia} \\
B'_{Ra}(t) = \nu_B \cdot B_{Ia} - \mu_B \cdot B_{Ra} \\
B'_{Sj}(t) = \gamma \cdot B_a - \left( b \cdot p_{MB} \cdot \frac{M_I(t)}{B_T(t)} + \mu_{Bj} \right) \cdot B_{Sj}(t) \\
B'_{Ej}(t) = b \cdot p_{MB} \cdot \frac{M_I(t)}{B_T(t)} \cdot B_{Sj}(t) - (\mu_{Bj} + \theta_B) \cdot B_{Ej} \\
B'_{Ij}(t) = \theta_B \cdot B_{Ej} - (\mu_{Bj} + \nu_B) \cdot B_{Ij} \\
B'_{Rj}(t) = \nu_B \cdot B_{Ij} - \mu_{Bj} \cdot B_{Rj}
\end{array} \right.$$

22

23 In the proposed system,  $M_S$ ,  $M_E$  and  $M_I$  respectively represent the susceptible, exposed and infectious  
24 mosquito population, whereas  $B_{Sa}$ ,  $B_{Ea}$ ,  $B_{Ia}$ , and  $B_{Ra}$  represent susceptible, exposed, infectious and recovered  
25 competent adult birds, and  $B_{Sj}$ ,  $B_{Ej}$ ,  $B_{Ij}$ , and  $B_{Rj}$  represent susceptible, exposed infectious and recovered  
26 competent juvenile birds. Model parameters are reported in the following table:

27 **Table A:** table of parameters used in the modelling framework, with their biological explanation

| Parameter   | Explanation                                                               | Value                                                                 | Source   |
|-------------|---------------------------------------------------------------------------|-----------------------------------------------------------------------|----------|
| $\mu_M$     | Mosquito death rate (day <sup>-1</sup> )                                  | $\frac{4.61}{151.6 - 4.75 \cdot T}$                                   | [1,2]    |
| $p_{BM}$    | Probability of WNV transmission from bird to mosquito per infectious bite | $\frac{e^{(-10.917+0.365 \cdot T)}}{1 + e^{(-10.917+0.365 \cdot T)}}$ | [3]      |
| $\theta_M$  | Extrinsic incubation period (day <sup>-1</sup> )                          | $0.132 + 0.0092 \cdot T$                                              | [4]      |
| $\theta_B$  | Intrinsic incubation period (day <sup>-1</sup> )                          | 0.5                                                                   | [5]      |
| $\gamma(t)$ | Avian fertility rate at day t (day <sup>-1</sup> )                        | 0.5 (t ≤ July 20)<br>0 (t > July 20)                                  | [6]      |
| $\mu_B$     | Death rate of adult birds (day <sup>-1</sup> )                            | 0.0015                                                                | [6]      |
| $\mu_{Bj}$  | Death rate of juvenile birds (day <sup>-1</sup> )                         | 0.0083                                                                | [6]      |
| $b$         | Mosquito biting rate                                                      | $f \cdot 0.122 \cdot \log(T - 9)^{1.76}$                              | [7]      |
| $f$         | Fraction of bites directed to the competent bird species                  | *                                                                     | [7], [8] |
| $p$         | Avian competence                                                          | **                                                                    | -        |
| $p_{MB}$    | Birds' susceptibility                                                     | **                                                                    | -        |
| $\nu_B$     | Avian recovery rate                                                       | **                                                                    |          |

28 \* Two different fraction of bites were estimated by the MCMC, one for the early season ( $f_1$ ) and one for the late  
 29 season ( $f_2$ )

30 \*\* estimated by the MCMC

31

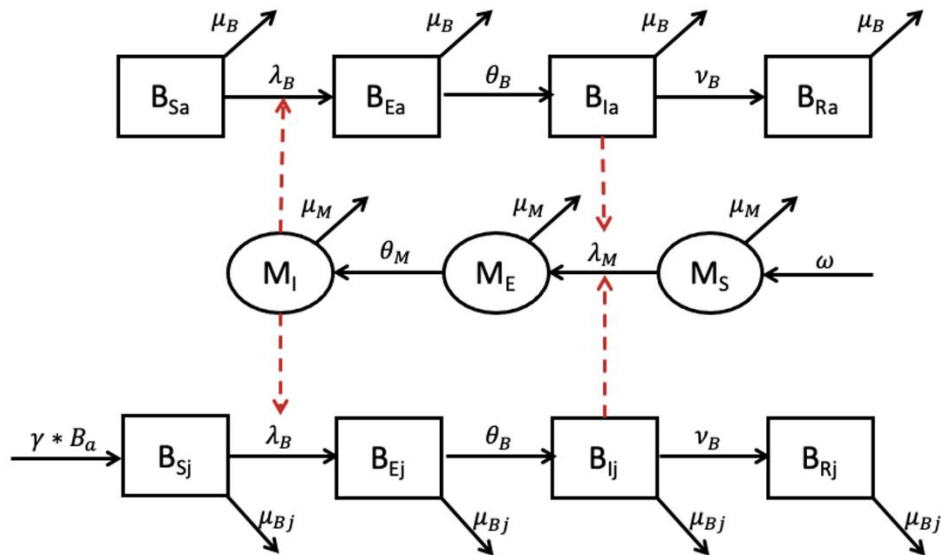

32

33 **Figure A:** Model scheme. Model flow chart for WNV transmission in birds (squares) and mosquitoes (circles)  
 34 in an average trapped area. Compartments:  $B_{Sa}$ ,  $B_{Ea}$ ,  $B_{Ia}$  and  $B_{Ra}$  ( $B_{Sj}$ ,  $B_{Ej}$ ,  $B_{Ij}$  and  $B_{Rj}$ ): adult (juvenile) suscepti-  
 35 ble, exposed, infectious and immune birds;  $M_s$ ,  $M_e$  and  $M_i$ : susceptible, exposed and infectious mosquitoes.  
 36 Parameters  $\lambda_B$  and  $\lambda_M$  are the forces of infection for birds and mosquitoes, respectively, and are computed  
 37 as  $\lambda_B = b \cdot p_{MB} \cdot \frac{M_I}{B_T}$  and  $\lambda_M = b \cdot p_{BM} \cdot \frac{(B_{Ia} + B_{Ij})}{B_T}$ , with  $B_T$  being the total avian population and  $B_a$  the num-  
 38 ber of adult birds.

39 **Additional results**

40 **Model fit**

41 The model fit was quite satisfactory, as 98% of the total (considering all years and subregions) number of  
42 weekly positive pools lay within the 95% CI predictions of the model (Fig B).

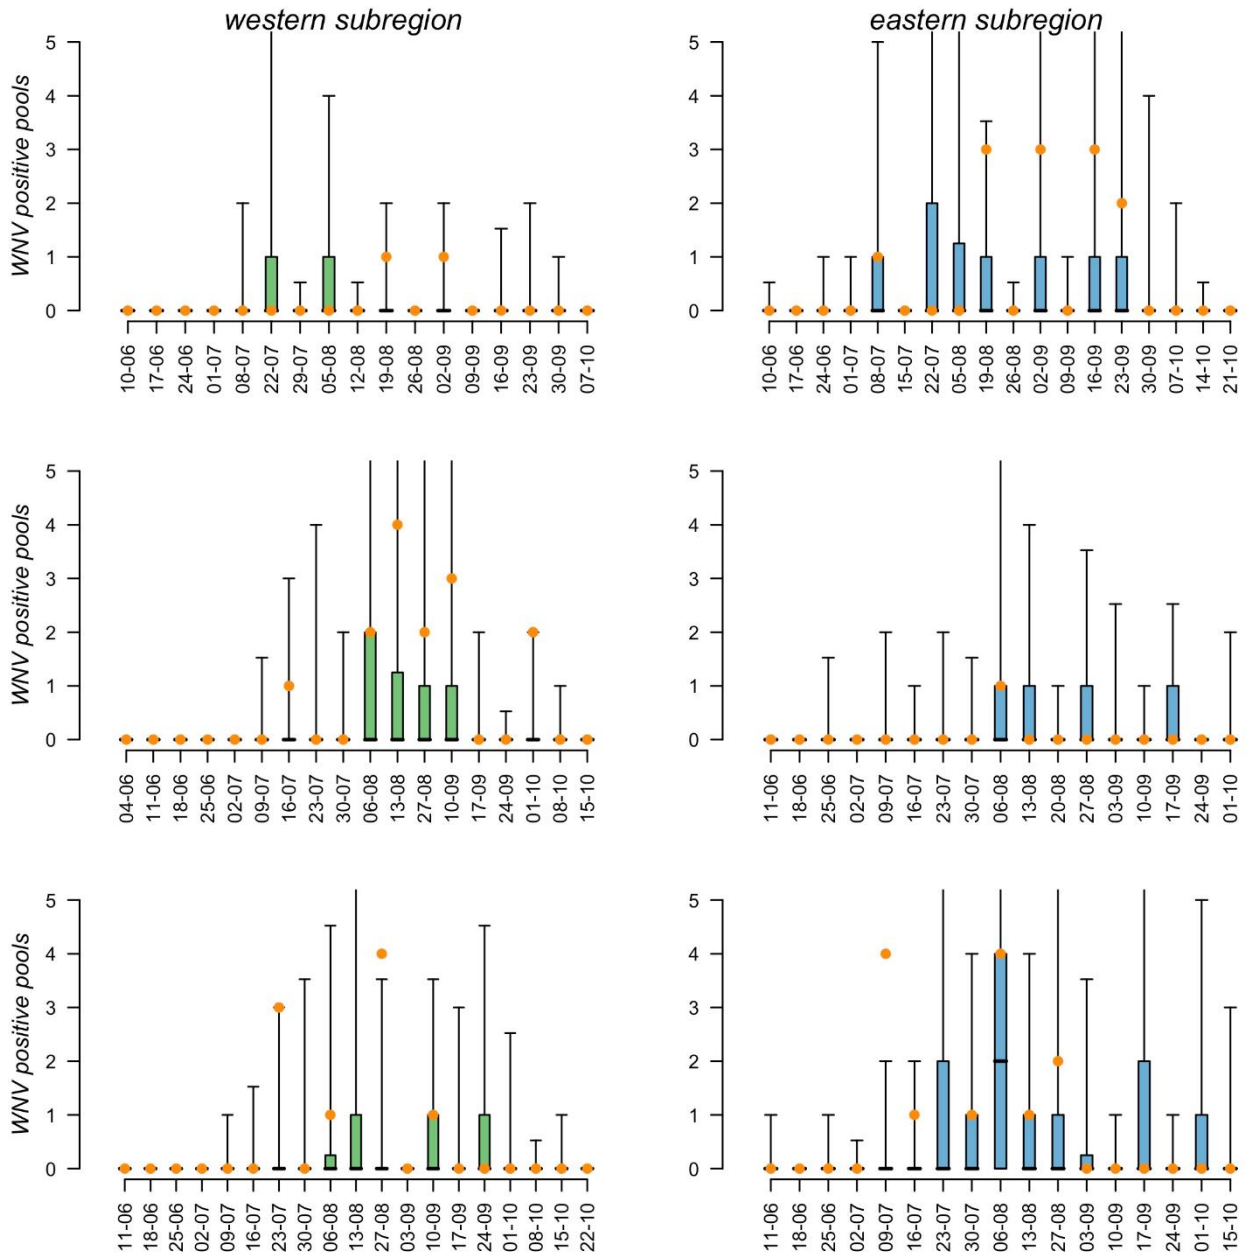

43  
44 **Figure B: Model prediction fit.** Predicted number of WNV-positive pools for the three years (first line for  
45 2016, second line for 2017 and third line for 2018) and the two areas. Orange points: observed weekly

46 number of WNV-positive pools; green and blue boxplots (median, 2.5 and 97.5% quantiles): the predicted  
47 distributions of positive pools per week in the western and eastern subregion respectively.

## 48 **WNV spread and prevalence**

49 We investigated WNV prevalence in mosquitoes (**Fig C**) and birds (**Fig D**) in the Lombardy region, according  
50 to model assumptions. Model simulations predict a low prevalence of WNV for the mosquito population in  
51 all years and subregions, never exceeding a daily mean prevalence of 0.231%. In all years and subregions,  
52 the lowest prevalence is shown up to July, and then we can see its increase, a peak in early/late August and  
53 a slight decrease and stabilization. The increase and decrease slopes and the timing for the prevalence peak  
54 both depend on the year and subregions considered. The lowest WNV prevalence in both mosquitoes and  
55 birds was predicted for the western subregions in 2018, with a mean mosquito prevalence of 0.053% (0-  
56 0.301% CI), and the highest was also predicted in the eastern subregions in 2018, with a mean prevalence  
57 of 0.231% (0.003-0.99% CI).

58 On the other hand, the avian prevalence was higher, reaching a daily mean of 8.38% (0.003-35.5% CI). It  
59 increased between June and July, reached the maximum between July and August and then slowly  
60 decreased up to October.

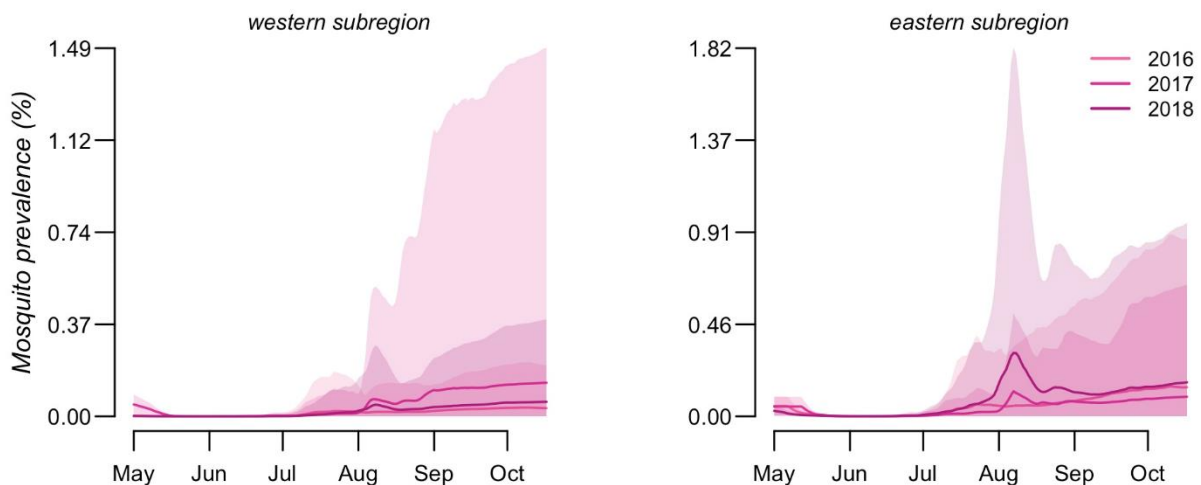

61

62 **Figure C: Model predictions.** Predicted WNV prevalence in mosquitoes in subregions and years.

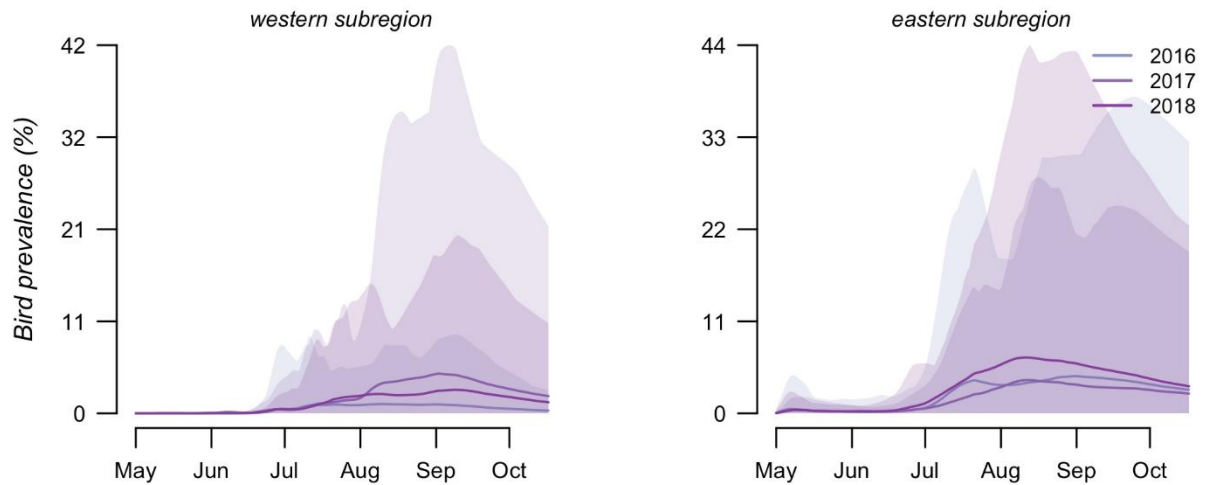

63

64 **Figure D: Model predictions.** Predicted WNV prevalence in the competent avian population (magpies) in  
 65 subregions and years.

66 **Parameter estimate**

67 Posterior distributions of the free parameters are reported in Figure E. As stated in the main text, no  
 68 association between the bird-related transmission parameters chosen for analysis in this context, and only  
 69 the proportion of immune birds at the beginning of the first simulated season in the western and eastern  
 70 subregions ( $i_{BW}$  and  $i_{BE}$ ,  $\text{corr}=0.98$ ,  $P<0.001$ ) and recovery rate and proportion of competent birds ( $v_B$  and  
 71  $a_i$ ,  $\text{corr}=-0.54$ ,  $P<0.001$ ) showed respectively positive and negative correlation (Fig F). The autocorrelation  
 72 analysis instead (Fig G) pointed out some correlation for the estimated parameters.

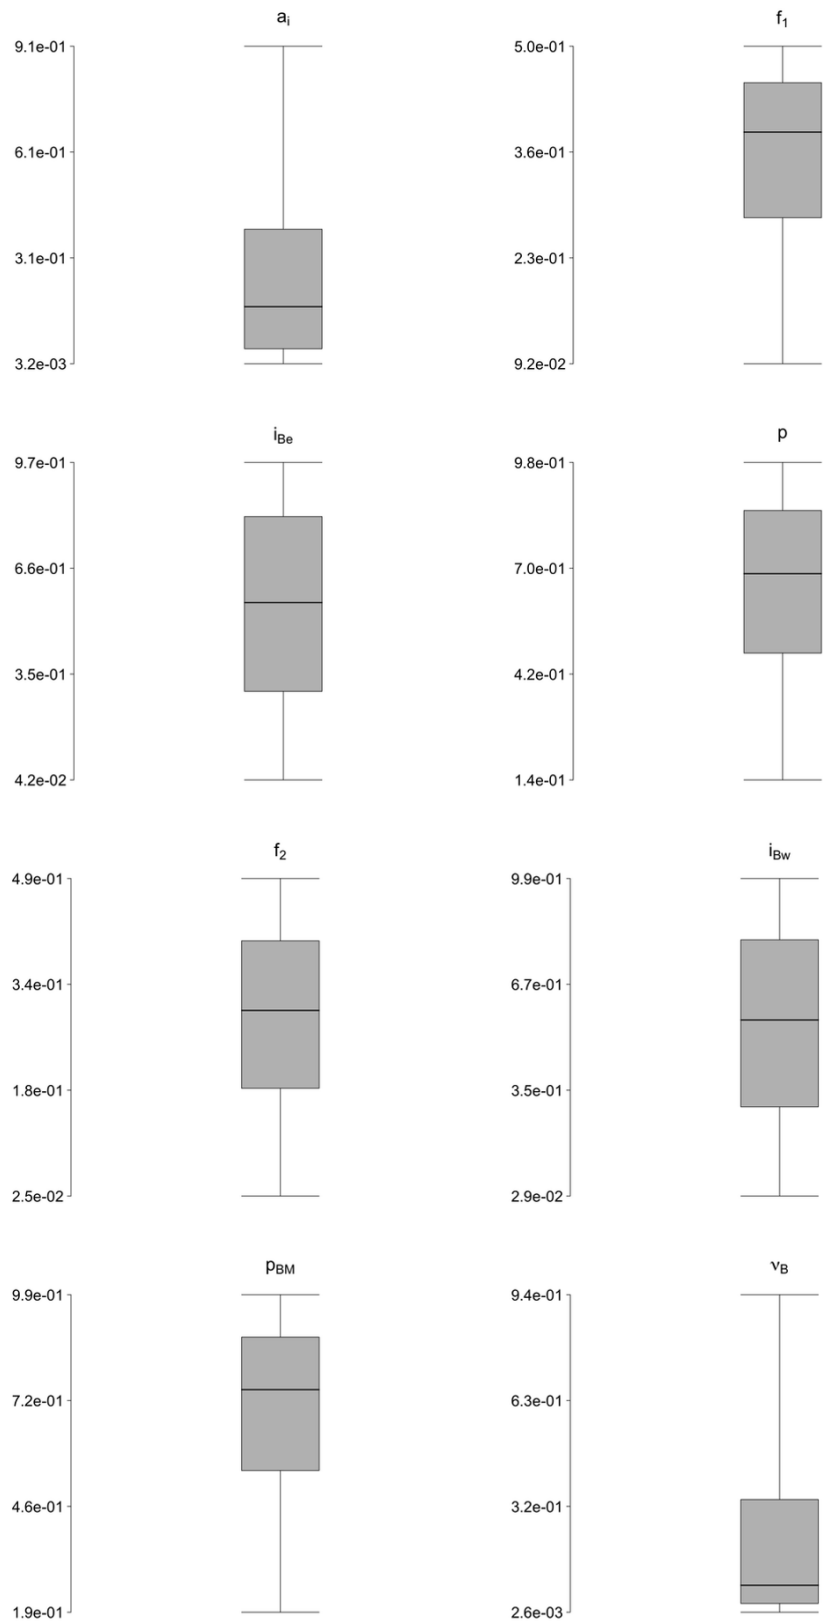

73

74 **Figure E: Posterior distribution of parameters.**



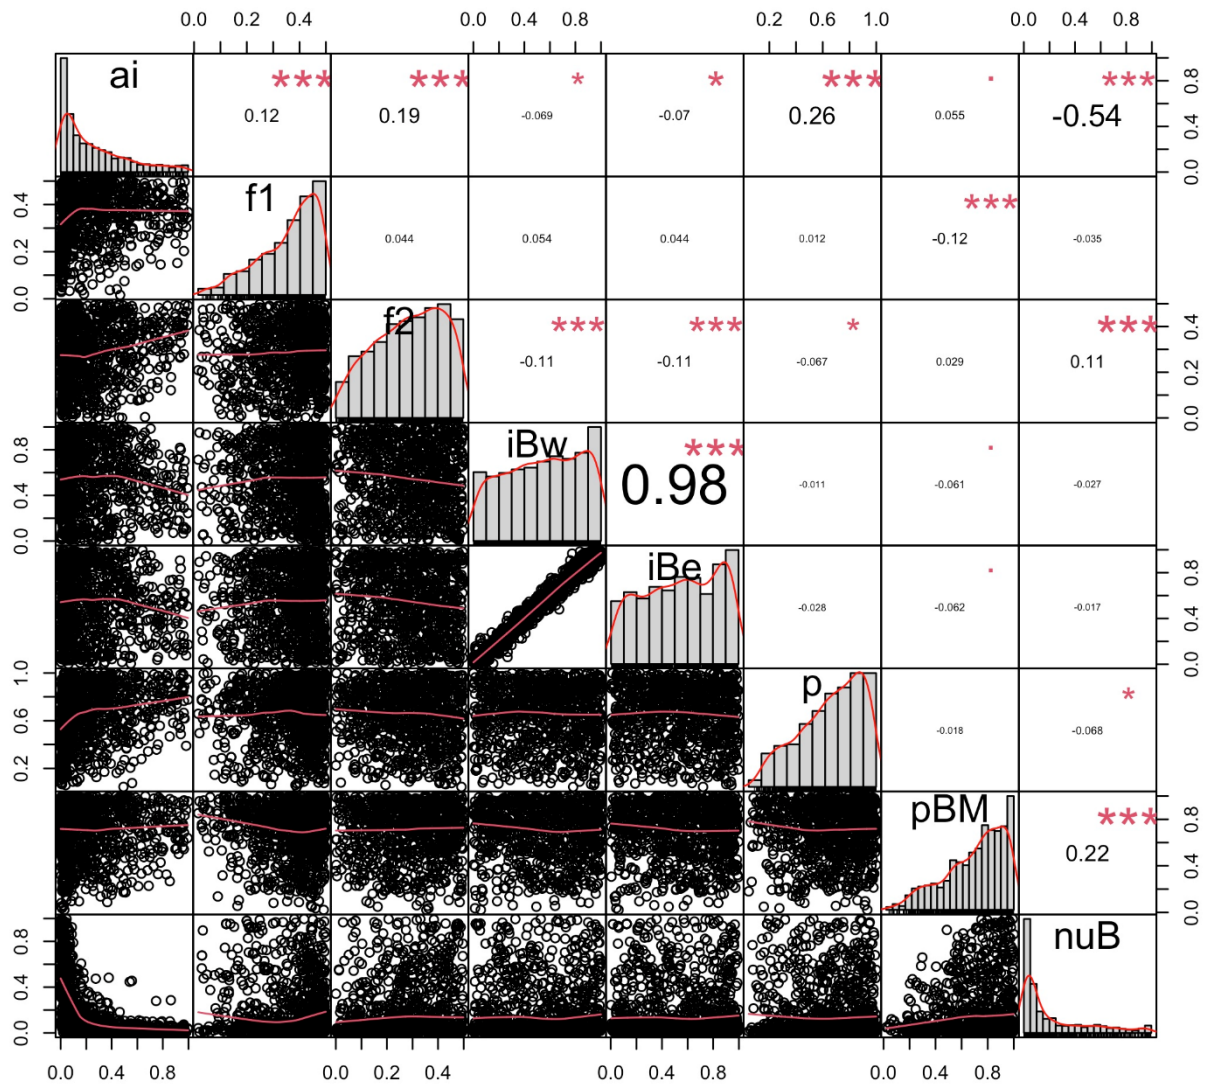

75

76 **Figure F: Correlation between epidemiological parameters.**

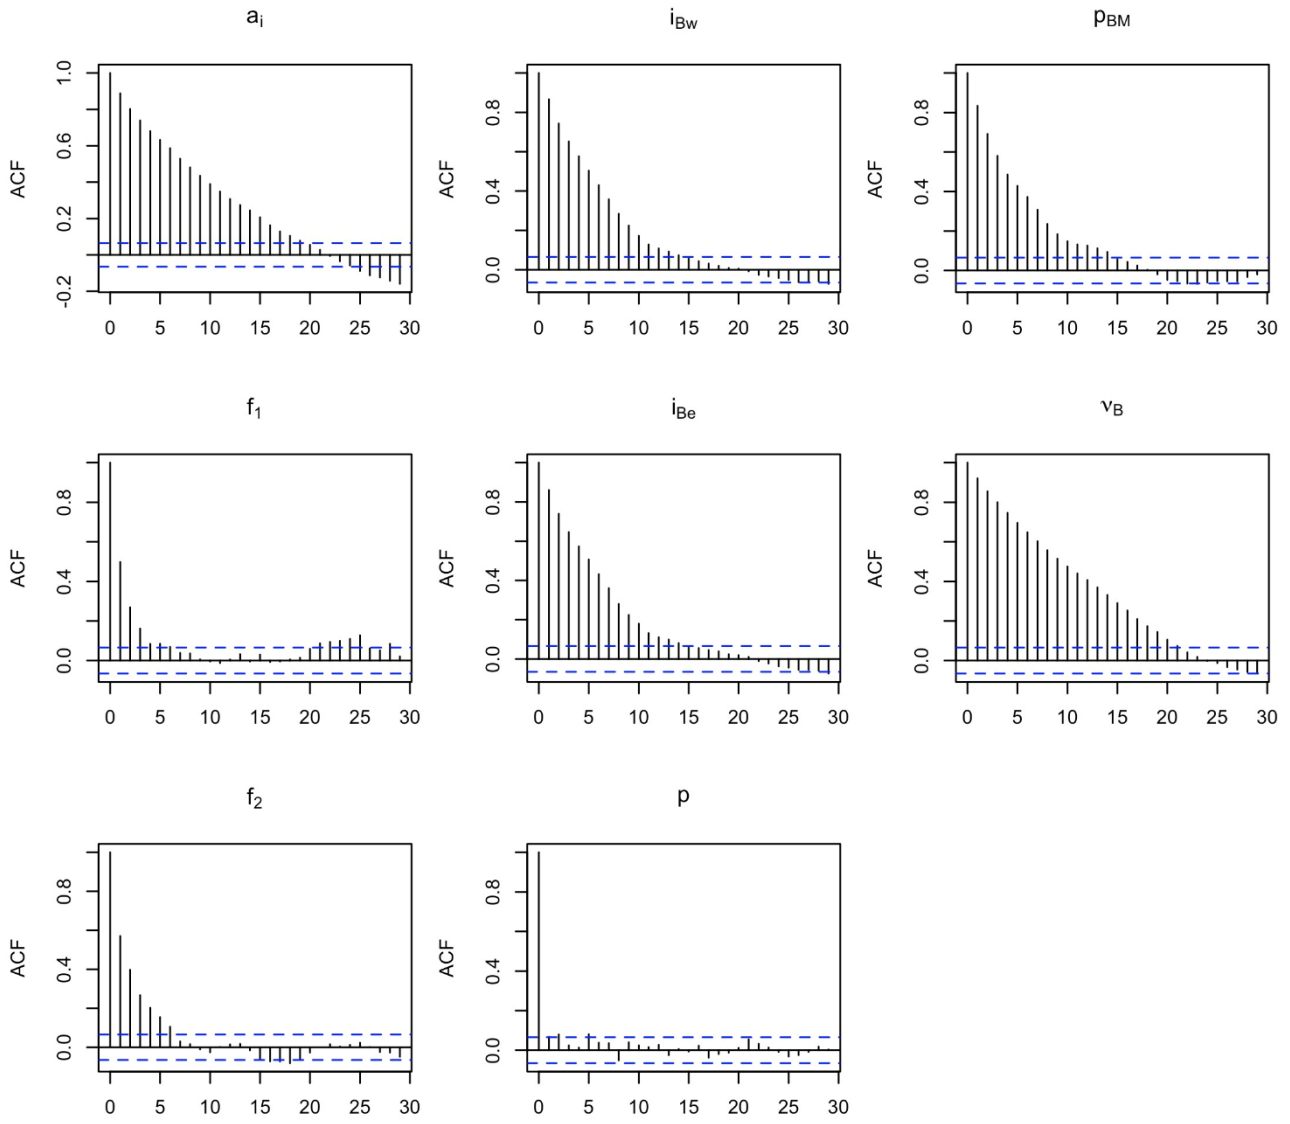

77

78 **Figure G: Autocorrelation of parameters.**

79

80 We carried out a pairwise perturbation analysis for the four key epidemiological parameters investigated,  
81 whose outcome is presented in Fig H. This analysis showed no combined effect of parameter perturbation.

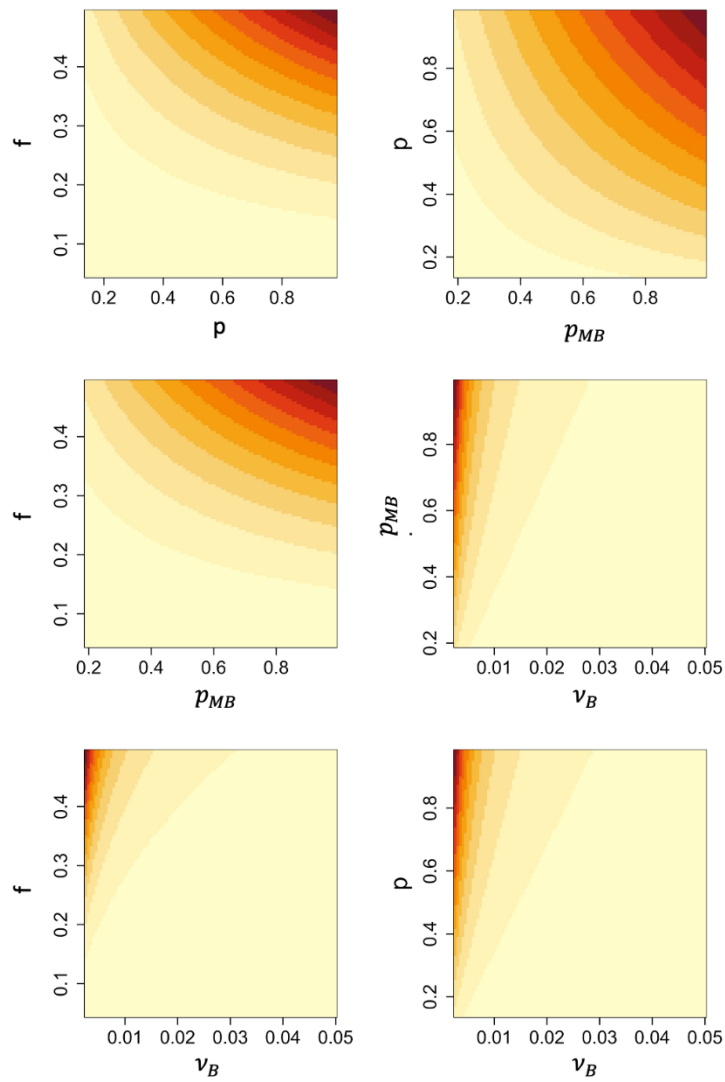

82

83 **Figure H: Pairwise perturbation of epidemiological parameters.**

84 **References**

- 85 1. Ciota AT, Matarachiero AC, Kilpatrick AM, Kramer LD. The Effect of Temperature on Life History Traits of  
86 *Culex* Mosquitoes. *J Med Entomol.* 2014;51: 55–62. doi:10.1603/ME13003
- 87 2. Marini G, Poletti P, Giacobini M, Pugliese A, Merler S, Rosà R. The Role of Climatic and Density  
88 Dependent Factors in Shaping Mosquito Population Dynamics: The Case of *Culex pipiens* in  
89 Northwestern Italy. *PLOS ONE.* 2016;11: e0154018. doi:10.1371/journal.pone.0154018
- 90 3. Vogels CBF, Fros JJ, Göertz GP, Pijlman GP, Koenraadt CJM. Vector competence of northern European  
91 *Culex pipiens* biotypes and hybrids for West Nile virus is differentially affected by temperature. *Parasit*  
92 *Vectors.* 2016;9: 393. doi:10.1186/s13071-016-1677-0
- 93 4. Reisen WK, Fang Y, Martinez VM. Effects of Temperature on the Transmission of West Nile Virus by  
94 *Culex tarsalis* (Diptera: Culicidae). *J Med Entomol.* 2006;43: 309–317. doi:10.1093/jmedent/43.2.309
- 95 5. Del Amo J, Llorente F, Pérez-Ramirez E, Soriguer RC, Figuerola J, Nowotny N, et al. Experimental  
96 infection of house sparrows (*Passer domesticus*) with West Nile virus strains of lineages 1 and 2. *Vet*  
97 *Microbiol.* 2014;172: 542–547. doi:10.1016/j.vetmic.2014.06.005
- 98 6. Summers-Smith JD. The sparrows: a study of the genus. *Passer T AD Poyser Staff Engl.* 1988.
- 99 7. Ewing DA, Cobbold CA, Purse BV, Nunn MA, White SM. Modelling the effect of temperature on the  
100 seasonal population dynamics of temperate mosquitoes. *J Theor Biol.* 2016;400: 65–79.  
101 doi:10.1016/j.jtbi.2016.04.008
- 102 8. Rizzoli A, Bolzoni L, Chadwick EA, Capelli G, Montarsi F, Grisenti M, et al. Understanding West Nile virus  
103 ecology in Europe: *Culex pipiens* host feeding preference in a hotspot of virus emergence. *Parasit*  
104 *Vectors.* 2015;8: 213. doi:10.1186/s13071-015-0831-4  
105
